# Supplementary material
Source: PubMed Central journal article supplement (PMC5441772)
Supplement: pnas.1619582114.sapp.pdf [file pnas.1619582114.sapp.pdf]

Supplemental Information:

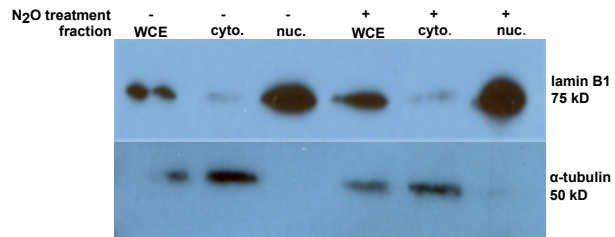

**Figure S1.** Western blot of whole cell, cytosolic, and nuclear fractions for nuclear (lamin B1) and cytosolic ( $\alpha$ -tubulin) marker proteins from HeLa cells harvested in tandem with those cells used for quantifying nuclear one-carbon folate forms (refer to Fig. 2C). The absence of  $\alpha$ -tubulin in the lanes corresponding to nuclear fractions confirms the lack of cytosolic contamination in nuclei. Lane designations: WCE, whole cell extract; cyto, cytosolic; nuc, nuclear. N<sub>2</sub>O, nitrous oxide.

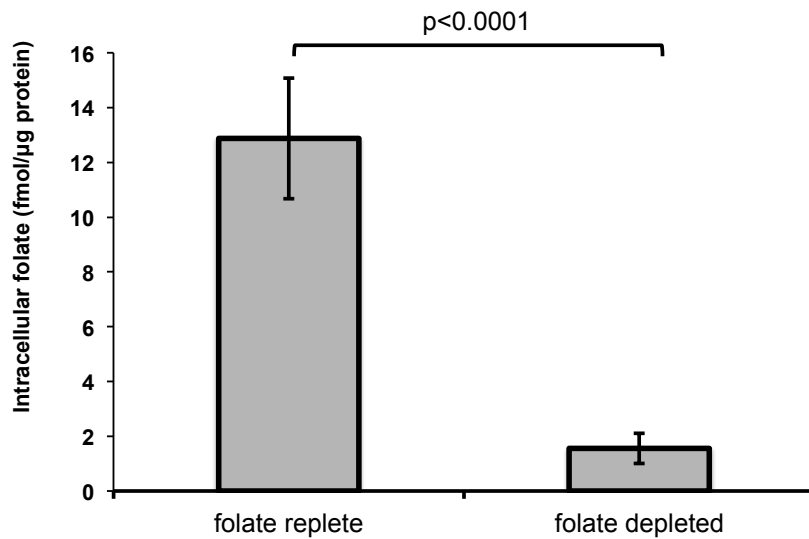

**Figure S2.** Intracellular folate concentrations in HeLa cells assayed for  $\gamma$ H2AX at the time of staining and quantification (refer to Fig. 3). The intracellular folate concentrations were 8-fold higher in HeLa cells maintained in folate-replete (25 nM) media compared to those cultured in folate-depleted (5 nM) conditions ( $p < 0.0001$ ). Data are shown as the mean  $\pm$  S.D. of  $n=4$  groups for each folate replete or folate depleted condition. Significance was determined by using a Student's two-tailed t-test.

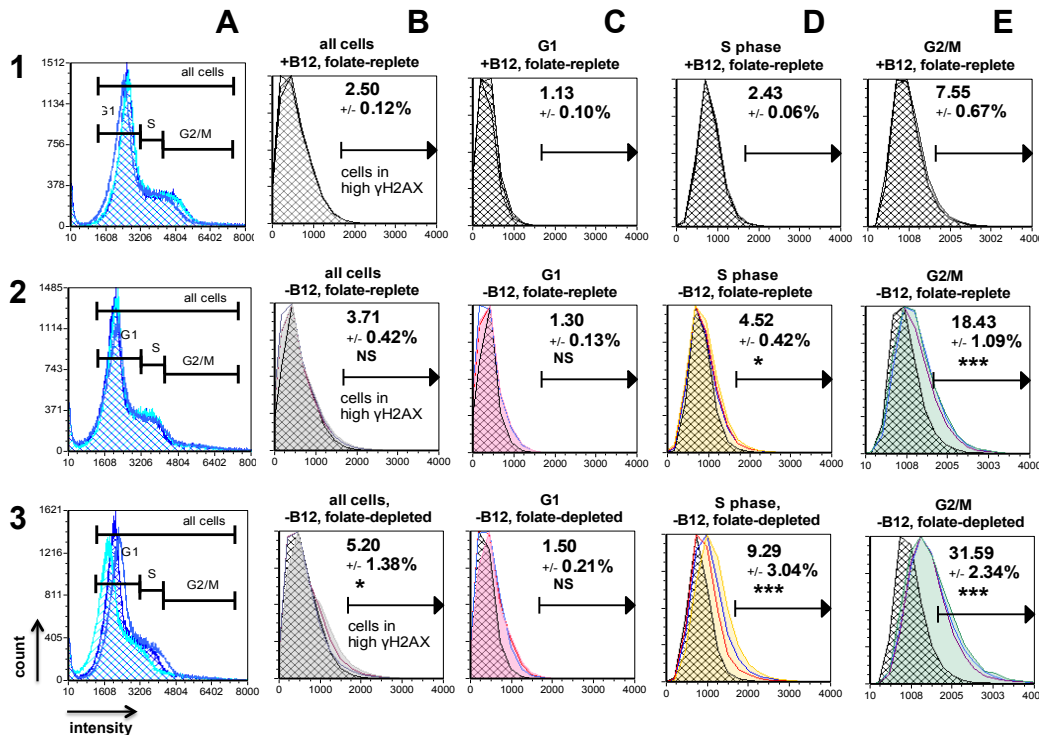

**Figure S3.** Vitamin B12 depletion induces changes in  $\gamma$ H2AX, a marker of DNA damage, in the S and G2/M phases of the cell cycle in HeLa cells. Cells were stained for DNA content (Vybrant Violet; 1-3A) and  $\gamma$ H2AX (FITC; 1-3 B-E); individual plots depict the cell count (Y-axis) versus fluorescence intensity (X-axis). The high  $\gamma$ H2AX parameter is a threshold defined by the mean top 2.5% of cells in the G1, S, and G2/M ('all cells') stained for  $\gamma$ H2AX in the vitamin B12- and folate-replete condition (1B), and this gate was uniformly applied to all conditions and cell cycle phases. Each plot shows the mean percent high  $\gamma$ H2AX  $\pm$  S.D. for triplicates for each experimental condition and cell cycle phase. Individual triplicates stained for  $\gamma$ H2AX in each condition are plotted relative to the corresponding mean  $\gamma$ H2AX values in the vitamin B12- and folate-replete condition (hatched histograms, 1B-E). Asterisks designate statistical significance in percent high  $\gamma$ H2AX values between treatment conditions and cell cycle phase compared to the corresponding phases in the vitamin B12- and folate-replete condition (1B-E). The greatest percentage of cells in high  $\gamma$ H2AX within conditions was observed in G2/M under vitamin B12- and folate-depleted conditions ( $p < 0.001$ ; 3E). A combined vitamin B12 and folate depletion exacerbated the percent high  $\gamma$ H2AX observed in HeLa cells compared to cells maintained in vitamin B12-depleted and folate-replete culture conditions in all cells, S, and G2/M (compare 2A,D-E to 3A,D-E), and this difference in high  $\gamma$ H2AX between conditions was significant for S phase ( $p = 0.01$ ) and G2/M ( $p = 0.0003$ ). Statistical significance was determined using a one-way ANOVA. The dependent variable was log-transformed percent high  $\gamma$ H2AX, and the

independent variable was vitamin B12 and folate level. Folate-replete, 25 nM (6S) 5-formylTHF in culture media; Folate-depleted, 5 nM (6S) 5-formylTHF in culture media. The statistical significance is represented as follows: NS = Not significant ( $p > 0.05$ ); \* =  $0.01 < p < 0.05$ ; \*\* =  $0.01 < p < 0.001$ ; \*\*\* =  $p < 0.001$

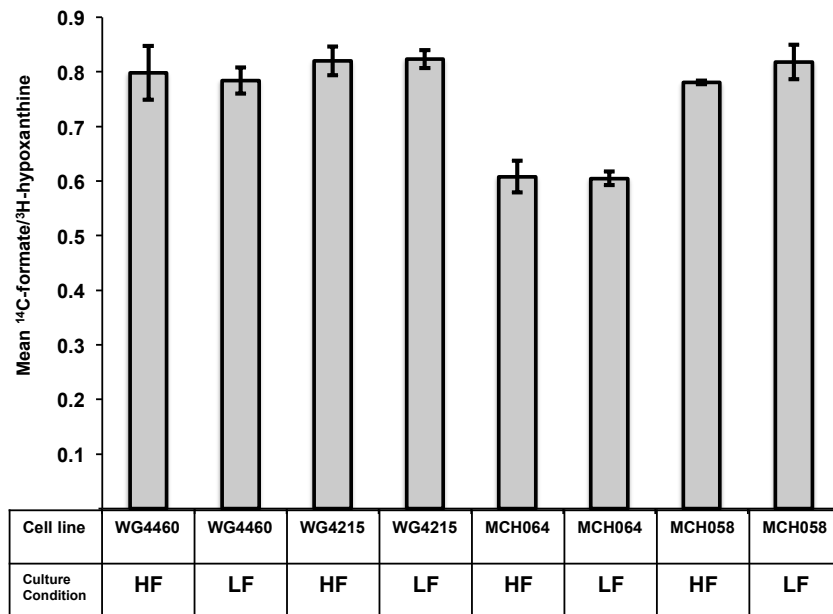

**Figure S4.** Mean ratio of  $^{14}\text{C}$ -formate/ $^3\text{H}$ -hypoxanthine incorporation into nuclear DNA in cblG (WG4215 and WG4460) and control (MCH064 and MCH058) fibroblasts. Data are shown as mean  $\pm$  S.D. for fibroblast line and treatment. A two-way ANOVA revealed a non-significant effect of folate exposure ( $p > 0.05$ ) and a significant effect of fibroblast genotype ( $p = 0.02$ ) on the rank-transformed mean ratios of  $^{14}\text{C}/^3\text{H}$  incorporated into nuclear DNA. HF, 25 nM (6S) 5-formylTHF; LF, 5 nM (6S) 5-formylTHF.

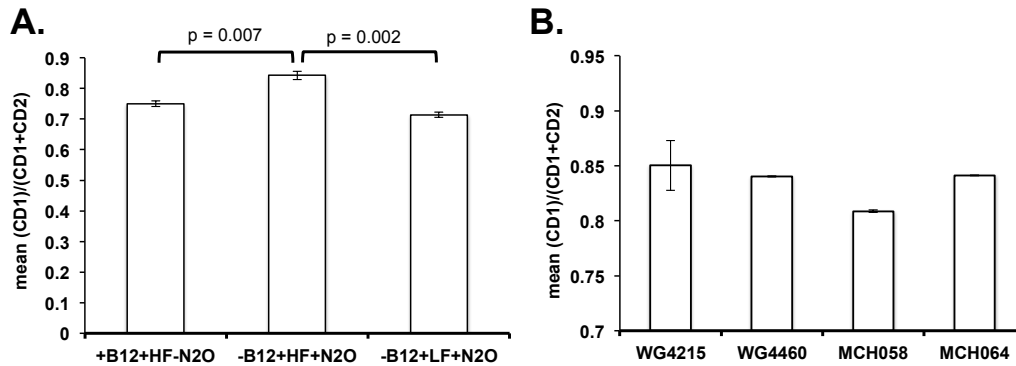

**Figure S5.** Mean ratio of isotopically labeled one-carbon units from MTHFD1 (CD1) to the total number of labeled one-carbons containing 1 or 2 deuterium atoms generated from MTHFD1 (CD1) or SHMT (CD2), respectively, into thymidine in nuclear DNA in (A) HeLa cells and (B) human fibroblasts. (A) Vitamin B12-depleted and folate-replete conditions increased the contribution of labeled one-carbon units from MTHFD1 relative to SHMT by 12% compared to vitamin B12 and folate-replete conditions in HeLa cells ( $p=0.007$ ). The ratios between vitamin B12-depleted conditions were significant ( $p=0.002$ ). (B) In human cblG (WG4215 and WG4460) and control fibroblasts (MCH058 and MCH064) grown under high folate conditions, there was no difference in the contributions of one-carbon units from MTHFD1 ( $p>0.05$ ). For (A) and (B), cells were plated in duplicate, and the data are shown as mean  $\pm$  S.D. Statistical significance between conditions was assessed using a one-way ANOVA. The dependent variable was the log-transformed ratio of mean CD1/(CD1+CD2) and the independent variable was folate and vitamin B12 exposure. HF, 25 nM (6S) 5-formylTHF; LF, 5 nM (6S) 5-formylTHF.

TABLE S1. Fold differences in percent high  $\gamma$ H2AX<sup>1</sup> between control and experimental conditions<sup>2</sup> within cell cycle phase (to accompany Fig. 3).

|                                                                    | <b>All cells</b>                                   | <b>G1</b>                          | <b>S</b>                           | <b>G2/M</b>             |
|--------------------------------------------------------------------|----------------------------------------------------|------------------------------------|------------------------------------|-------------------------|
|                                                                    | Least Square (LS) Mean<br>95% CI (Lower,<br>Upper) | LS Mean<br>95% CI (L,U)            | LS Mean<br>95% CI (L,U)            | LS Mean<br>95% CI (L,U) |
| Treatment                                                          | <b>B</b>                                           | <b>C</b>                           | <b>D</b>                           | <b>E</b>                |
| <b>(1) B12- and folate-replete (control)</b>                       | <b>2.50</b>                                        | <b>0.76</b>                        | <b>2.46</b>                        | <b>8.99</b>             |
| <b>(2) B12-replete, folate-depleted</b>                            | 2.10***<br>(1.65, 2.66)                            | 1.12 <sup>NS</sup><br>(0.89, 1.40) | 1.55 <sup>NS</sup><br>(1.11, 2.16) | 1.84**<br>(1.39, 2.43)  |
| <b>(3) B12-depleted, folate-replete</b>                            | 3.16***<br>(2.42, 4.13)                            | 2.25***<br>(1.74, 2.90)            | 4.50***<br>(3.10, 6.52)            | 2.80***<br>(2.05, 3.84) |
| <b>(4) B12- and folate-depleted</b>                                | 5.38***<br>(4.23, 6.83)                            | 4.83***<br>(3.85, 6.06)            | 9.02***<br>(6.47, 12.59)           | 4.85***<br>(3.66, 6.42) |
| <b>(5) B12-depleted: folate-replete vs. depleted (row 3 vs. 4)</b> | 1.70**<br>(1.30, 2.23)                             | 2.15***<br>(1.67, 2.77)            | 2.01*<br>(1.38, 2.91)              | 1.73*<br>(1.26, 2.37)   |

<sup>1</sup>Percent (%) high  $\gamma$ H2AX refers to the percentage of HeLa cells stained for  $\gamma$ H2AX above the mean top 2.5% total  $\gamma$ H2AX intensity in 'all cells' in the vitamin B12- and folate-replete (control) condition (Figure 3, 1B). Columns show the back-transformed least-squares (LS) means and 95% confidence intervals (CI) for Log<sub>e</sub> transformed mean % high  $\gamma$ H2AX for specific contrasts, indicating fold differences in % high  $\gamma$ H2AX. Values for LS means in row 1B-E for control conditions are those mean % high  $\gamma$ H2AX predicted by the model. LS means and 95% CI were back-transformed = exp<sup>1</sup>(LS Mean) = geometric mean % high  $\gamma$ H2AX.

<sup>2</sup>Post-hoc comparisons (n=3) were made within cell cycle phase ('all cells', G1, S, G2/M) and compared the % high  $\gamma$ H2AX in the control to that in row: 2) B12-replete, folate-depleted, 3) B12-depleted, folate-replete, and 4) B12- and folate-depleted conditions. A final comparison considered the difference in % high  $\gamma$ H2AX between B12 depleted conditions (row 3 vs. 4). A Bonferroni correction was applied to all p-values to account for multiple comparisons (n=4).

Legend: NS = Not significant (p > 0.05); \* = 0.01 < p < 0.05; \*\* = 0.01 < p < 0.001; \*\*\* = p < 0.001
